# Supplementary material for: The facile synthesis and electrochemical performance of Ni2V2O7 as a novel anode material for lithium-ion batteries
Source: Royal Society of Chemistry journal article supplement (doi:10.1039/d1dt00983d), 2021-01-01
Supplement: d1dt00983d1.pdf [file d1dt00983d1.pdf]

Supplementary data

## Facile synthesis and electrochemical performance of $\text{Ni}_2\text{V}_2\text{O}_7$ as a novel anode material for lithium-ion batteries

Zhiyong Zhou<sup>a</sup>, Jun Zhang<sup>b</sup>, He Duan<sup>c</sup>, Siyuan Chen<sup>a</sup>, Heng Yao<sup>a</sup>, Yanming Zhao<sup>a</sup>, Quan Kuang<sup>a</sup>, Qinghua Fan<sup>a</sup>, Youzhong Dong<sup>a\*</sup>

<sup>a</sup>School of Physics and Optoelectronics, South China University of Technology, Guangzhou, 510640, P. R. China

<sup>b</sup>Ruyuan Dongyangguang Magnetic Materials Co., Ltd. Shaoguan, 512700, P. R. China

<sup>c</sup>School of Physics and Optoelectronic Engineering, Guangdong University of Technology, Guangzhou, 510006, P. R. China

\*Corresponding author. E-mail address: [yzdong@scut.edu.cn](mailto:yzdong@scut.edu.cn) (Youzhong Dong)

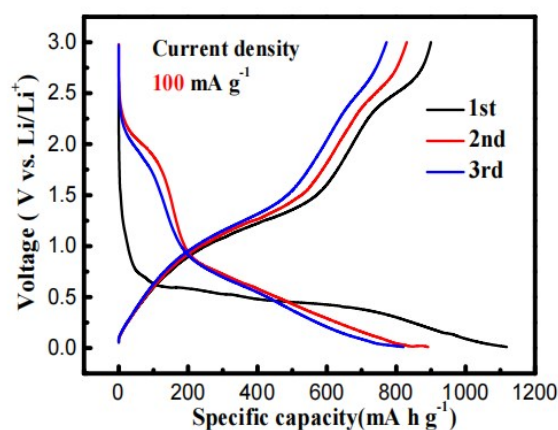

**Fig. S1.** The discharge/charge curves of the  $\text{Ni}_2\text{V}_2\text{O}_7$  electrode for the first three cycles with a current density of  $100 \text{ mA g}^{-1}$ .

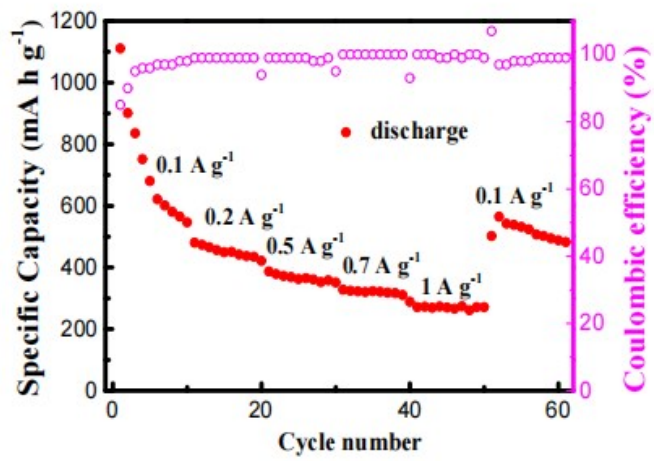

**Fig. S2.** The rate ability of the fresh  $\text{Ni}_2\text{V}_2\text{O}_7$  electrode.
